# Supplementary material for: Association between the sarcopenia index and the risk of stroke in elderly patients with hypertension: a cohort study
Source: publisher site journal article supplement (doi:10.18632/aging.204587), 2023-03-21
Supplement: Supplementary file [file aging-v15i6-204587-supplementary-material-SD2.pdf]

## SUPPLEMENTARY FIGURES

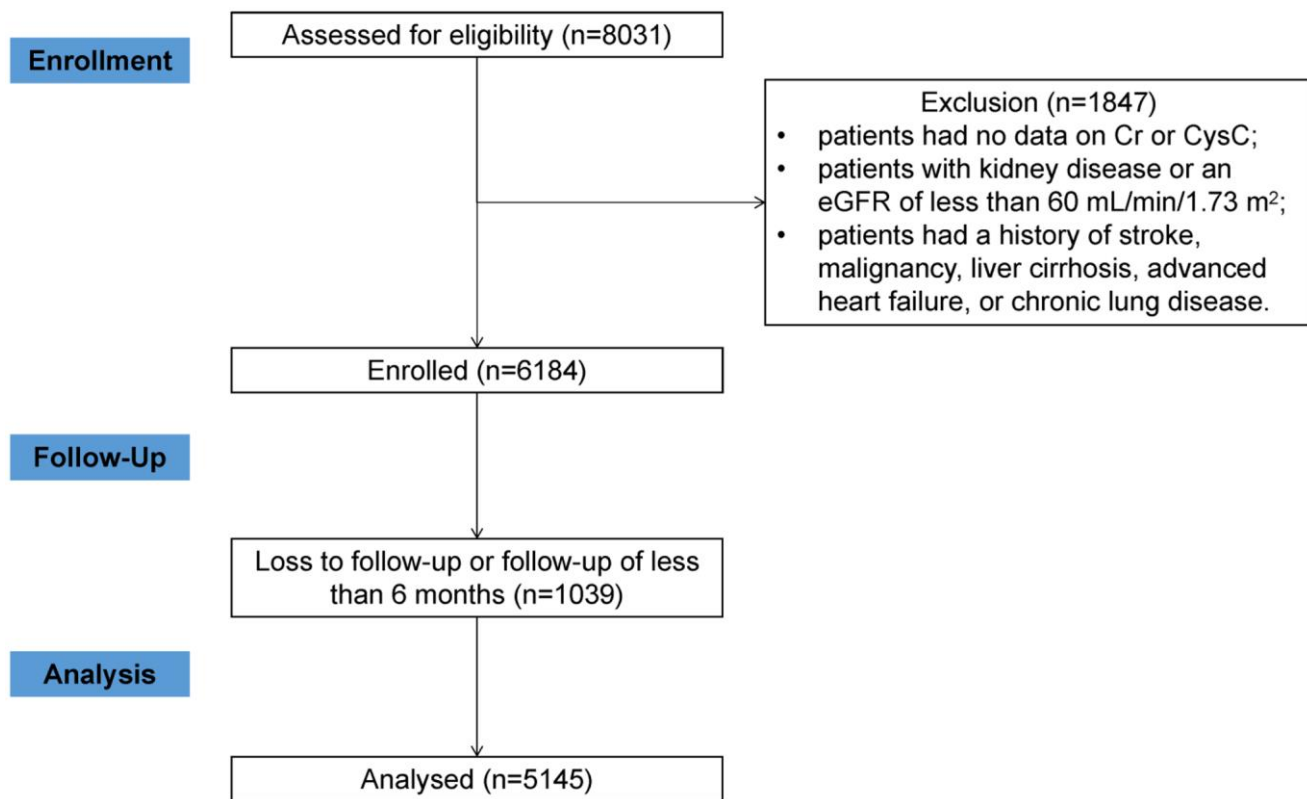

Supplementary Figure 1. Participant flow diagram.

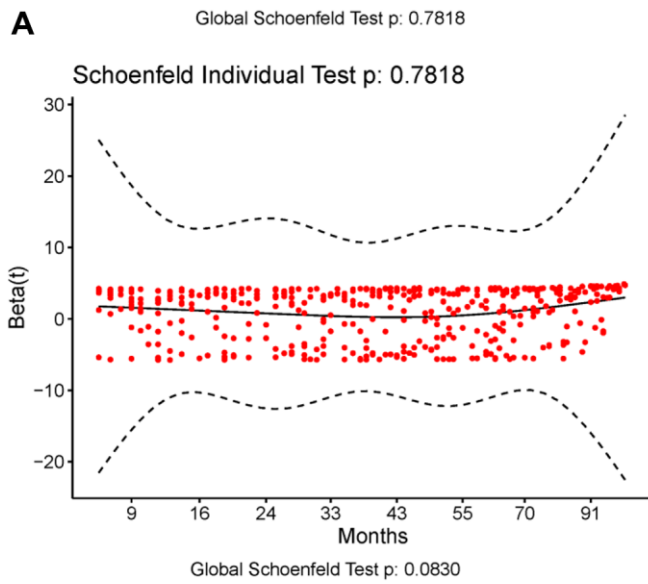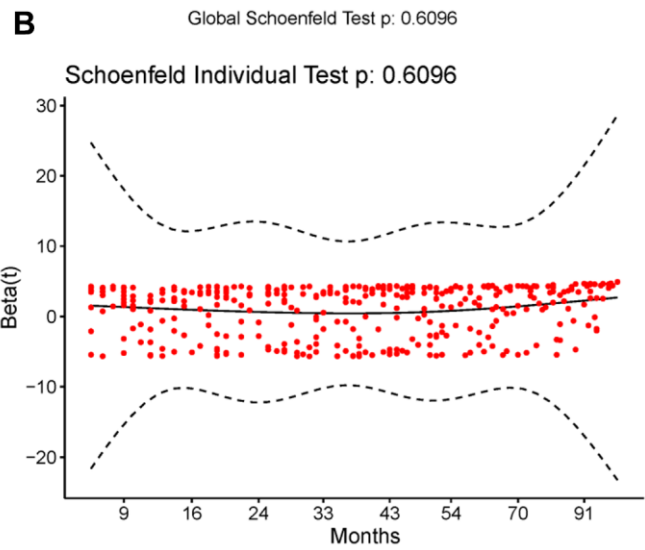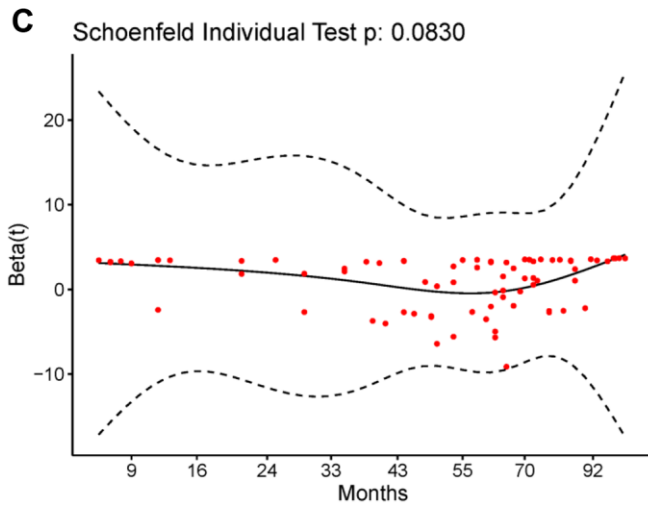

**Supplementary Figure 2. Plot of Schoenfeld residuals against time in the Cox regression model. (A) Total stroke; (B) Ischemic stroke; (C) Hemorrhagic stroke.**

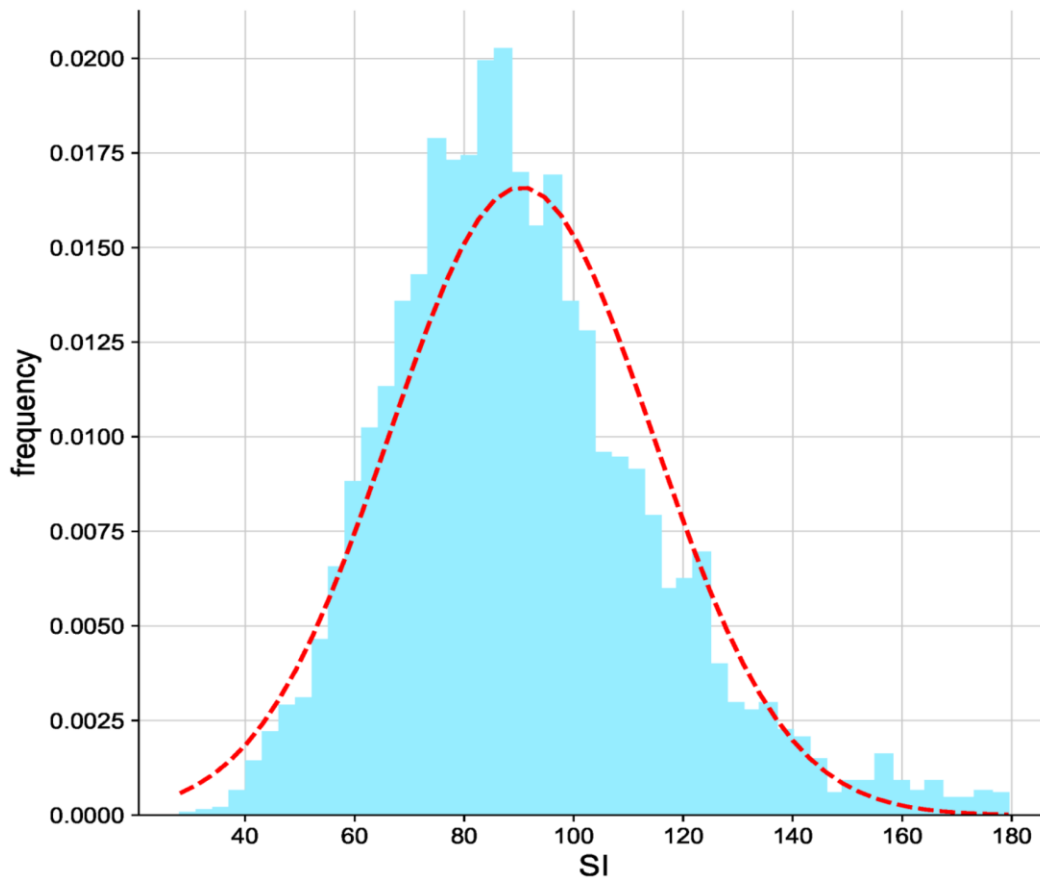

Supplementary Figure 3. Distribution of participants according to the SI.

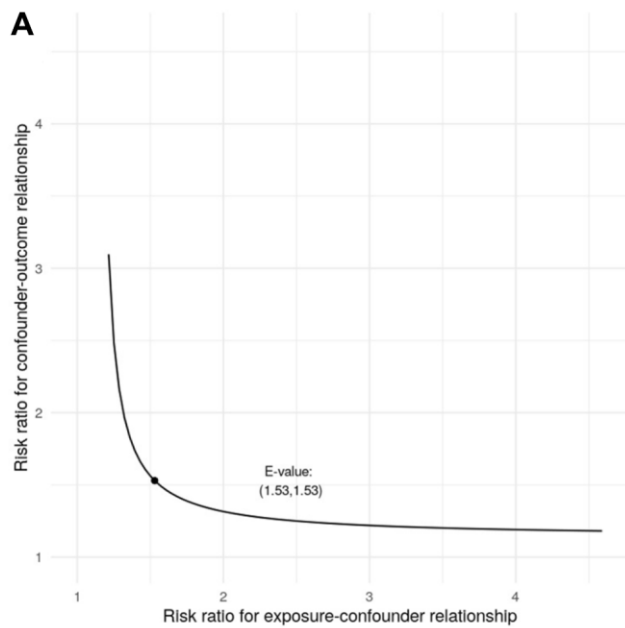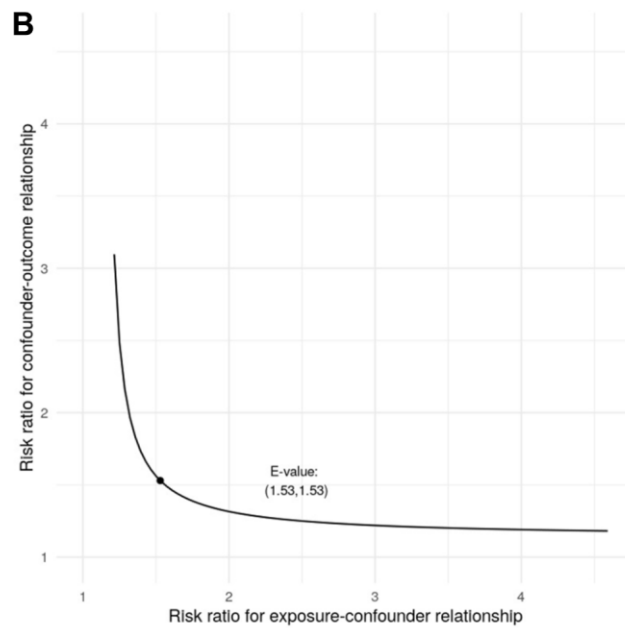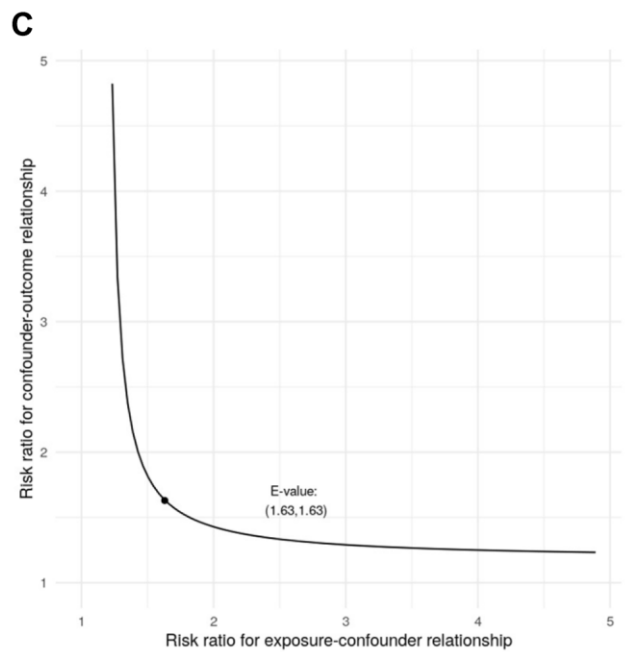

**Supplementary Figure 4. E-values for the observed associations between SI and clinical outcomes. (A) Total stroke; (B) Ischemic stroke; (C) Hemorrhagic stroke.**
